# Supplementary material
Source: JCI journal article supplement (doi:10.1172/jci204385)
Supplement: sd2 [file 2]

## Supplementary Acknowledgements

### Kidney Precision Medicine Project (KPMP) members

| Name                      | Affiliated Institution               | Role                             |
|---------------------------|--------------------------------------|----------------------------------|
| Alexander Morales         | Beth Israel Deaconess Medical Center | Biopsy Operator                  |
| Mark E. Williams          | Beth Israel Deaconess Medical Center | Co-Investigator                  |
| Stewart H. Lecker         | Beth Israel Deaconess Medical Center | Co-Investigator, Biopsy Operator |
| Laurence H Beck Jr        | Boston Medical Center                | Co-Investigator                  |
| IM Schmidt                | Boston Medical Center                | Co-Investigator                  |
| Ashish Upadhyay           | Boston Medical Center                | Co-Investigator                  |
| Ashish Verma              | Boston Medical Center                | Co-Investigator                  |
| Minxin Lu                 | Boston Medical Center                | Co-Investigator, Study staff     |
| Yan Zhou                  | Boston Medical Center                | Fellow                           |
| Stephanie J. Aw           | Boston Medical Center                | Other                            |
| Kifle Gebre               | Boston Medical Center                | Other                            |
| Shana Maikhor             | Boston Medical Center                | Other                            |
| Keyvona Moultrie          | Boston Medical Center                | Other                            |
| Florencia A. Rojas-Miguez | Boston Medical Center                | Other                            |
| Molly C Geraghty          | Boston Medical Center                | Pathologist                      |
| Joel M Henderson          | Boston Medical Center                | Pathologist                      |
| Narasimhan, R.            | Boston Medical Center                | Pathologist                      |
| Sushrut S. Waikar         | Boston Medical Center                | Principal Investigator           |
| Marie Florence Calixte    | Boston Medical Center                | Research Coordinator             |
| Courtney Huynh            | Boston Medical Center                | Research Coordinator             |
| Astrid Larson             | Boston Medical Center                | Research Coordinator             |
| Ingrid F Onul             | Boston Medical Center                | Research Coordinator             |
| Pranav Yadati             | Boston Medical Center                | Research Coordinator             |
| Guanghao Yu, BA           | Boston Medical Center                | Research Coordinator             |
| M. Todd Valerius          | Brigham and Women's Hospital         | Co-Investigator                  |
| Gearoid Michael McMahon   | Brigham and Women's Hospital         | Co-Investigator, Biopsy Operator |
| Mia R. Colona             | Brigham and Women's Hospital         | Other                            |
| Helmut Rennke             | Brigham and Women's Hospital         | Other                            |
| Astrid Weins              | Brigham and Women's Hospital         | Pathologist                      |
| Anna Greka                | Broad Institute                      | Other                            |
| Jamie L. Marshall         | Broad Institute                      | Other                            |
| Nir Hacohen               | Broad Institute                      | Principal Investigator           |
| Mark P. Aulisio           | Case Western Reserve University      | Co-Investigator                  |
| William S. Bush           | Case Western Reserve University      | Co-Investigator                  |
| Dana C. Crawford          | Case Western Reserve University      | Co-Investigator                  |
| Crystal A Gadegbeku       | Cleveland Clinic                     | Co-Investigator                  |

|                         |                                       |                                        |
|-------------------------|---------------------------------------|----------------------------------------|
| Jonathan J Taliercio    | Cleveland Clinic                      | Co-Investigator                        |
| Charles O'Malley        | Cleveland Clinic                      | Co-Investigator,Biopsy Operator        |
| Leslie Cooperman        | Cleveland Clinic                      | Other                                  |
| Stacey Jolly            | Cleveland Clinic                      | Other                                  |
| Ellen Palmer            | Cleveland Clinic                      | Other                                  |
| Leal Herlitz            | Cleveland Clinic                      | Pathologist                            |
| Michael Kuperman        | Cleveland Clinic                      | Pathologist                            |
| Kassandra Spates-Harden | Cleveland Clinic                      | Patient Partner                        |
| John F. O'Toole         | Cleveland Clinic                      | Principal Investigator                 |
| John R. Sedor           | Cleveland Clinic                      | Principal Investigator                 |
| Emilio D Poggio         | Cleveland Clinic                      | Principal Investigator,Co-Investigator |
| Lakeshia Bush           | Cleveland Clinic                      | Research Coordinator                   |
| Vivian Jeffers          | Cleveland Clinic                      | Research Coordinator                   |
| Kiasha Jones            | Cleveland Clinic                      | Research Coordinator                   |
| Marina Markovic         | Cleveland Clinic                      | Research Coordinator                   |
| Teresa Randle           | Cleveland Clinic                      | Research Coordinator                   |
| Dianna Sendrey          | Cleveland Clinic                      | Research Coordinator                   |
| Paul S. Appelbaum       | Columbia University                   | Other                                  |
| Olivia Balderes         | Columbia University                   | Other                                  |
| Pietro A. Canetta       | Columbia University                   | Other                                  |
| Karla Mehl              | Columbia University                   | Other                                  |
| Vivette . D'Agati       | Columbia University                   | Pathologist                            |
| Jonathan Barasch        | Columbia University                   | Principal Investigator                 |
| Andrew S. Bomback       | Columbia University                   | Principal Investigator                 |
| Krzysztof Kiryluk       | Columbia University                   | Principal Investigator                 |
| German varela           | Columbia University                   | Research Coordinator                   |
| Laura Barisoni          | Duke University                       | Co-Investigator,Pathologist            |
| Akhil Ambekar           | Duke University                       | Fellow                                 |
| Xiang Li                | Duke University                       | Fellow                                 |
| Bangchen Wang           | Duke University                       | Pathologist                            |
| Theodore Alexandrov     | European Molecular Biology Laboratory | Co-Investigator                        |
| Jia-Yun Chen            | Harvard University                    | Co-Investigator                        |
| Nils Gehlenborg         | Harvard University                    | Co-Investigator                        |
| Jia-Ren Lin             | Harvard University                    | Fellow                                 |
| Yi Zhang                | Harvard University                    | Fellow                                 |
| Mark S. Keller          | Harvard University                    | Other                                  |
| Seymour Rosen           | Harvard University                    | Pathologist                            |
| Sandro Santagata        | Harvard University                    | Principal Investigator                 |
| Sharon B Bledsoe        | Indiana University                    | Biopsy Operator                        |
| Ying-Hua Cheng          | Indiana University                    | Co-Investigator                        |

|                            |                                |                                 |
|----------------------------|--------------------------------|---------------------------------|
| Kenneth W. Dunn            | Indiana University             | Co-Investigator                 |
| Michael Ferkowicz          | Indiana University             | Co-Investigator                 |
| K. J. Kelly                | Indiana University             | Co-Investigator                 |
| Ricardo Melo Ferreira      | Indiana University             | Co-Investigator                 |
| Marcelino Rivera           | Indiana University             | Co-Investigator                 |
| Timothy A. Sutton          | Indiana University             | Co-Investigator                 |
| Debora Gisch               | Indiana University             | Co-Investigator,Fellow          |
| Azuma Nanamatsu            | Indiana University             | Fellow                          |
| Mohammad A. Sohail         | Indiana University             | Fellow                          |
| Mahla Asghari              | Indiana University             | Other                           |
| Andreas Bueckle            | Indiana University             | Other                           |
| Curtis Warfield            | Indiana University             | Patient Partner                 |
| Tarek M. El-Achkar         | Indiana University             | Principal Investigator          |
| Pierre C. Dagher           | Indiana University             | Principal Investigator          |
| Michael T Eadon            | Indiana University             | Principal Investigator          |
| Danielle Janosevic         | Indiana University             | Principal Investigator          |
| James C. Williams, Jr.     | Indiana University             | Principal Investigator          |
| Abraham Verdoes            | Indiana University             | Project Manager                 |
| Devin M. Wright            | Indiana University             | Project Manager                 |
| Stephanie Wofford          | Indiana University             | Research Coordinator            |
| Daria Barwinska            | Indiana University             | Study staff                     |
| William S. Bowen           | Indiana University             | Study staff                     |
| Angela R. Sabo             | Indiana University             | Study staff                     |
| Jennifer Stashevsky        | Indiana University             | Study staff                     |
| Katy Börner                | Indiana University Bloomington | Other                           |
| Ellen M. Quardokus         | Indiana University Bloomington | Other                           |
| Jini Ashok Bhanushali      | Indiana University Bloomington | Project Manager                 |
| Bruce W. Herr II           | Indiana University Bloomington | Project Manager,Other           |
| Elizabeth G. Record        | Indiana University Bloomington | Research Coordinator            |
| Derek M. Fine              | Johns Hopkins University       | Biopsy Operator                 |
| C. John Sperati            | Johns Hopkins University       | Biopsy Operator                 |
| Steven Menez               | Johns Hopkins University       | Co-Investigator                 |
| Mohamed G. Atta            | Johns Hopkins University       | Co-Investigator,Biopsy Operator |
| Jose M Monroy-Trujillo     | Johns Hopkins University       | Co-Investigator,Biopsy Operator |
| Yumeng Wen                 | Johns Hopkins University       | Co-Investigator,Fellow          |
| Lauren Bernard             | Johns Hopkins University       | Other                           |
| Noralinda B. Vitoria       | Johns Hopkins University       | Other                           |
| Alan Xu                    | Johns Hopkins University       | Other                           |
| Avi Z. Rosenberg           | Johns Hopkins University       | Pathologist                     |
| Chirag R. Parikh           | Johns Hopkins University       | Principal Investigator          |
| Celia P. Corona-Villalobos | Johns Hopkins University       | Project Manager                 |
| Mitali Barik               | Johns Hopkins University       | Research Coordinator            |

|                      |                          |                                 |
|----------------------|--------------------------|---------------------------------|
| Maria Chilo Bejarano | Johns Hopkins University | Research Coordinator            |
| Jeanine Hernandez    | Johns Hopkins University | Research Coordinator            |
| Sonya Shah           | Johns Hopkins University | Research Coordinator            |
| Ashley R. Wang       | Johns Hopkins University | Research Coordinator            |
| Paolo S. Silva       | Joslin Diabetes Center   | Co-Investigator                 |
| Jennifer K. Sun      | Joslin Diabetes Center   | Co-Investigator                 |
| Isabel Donohoe       | Joslin Diabetes Center   | Other                           |
| Camille Johansen     | Joslin Diabetes Center   | Other                           |
| N/A                  | Joslin Diabetes Center   | Other                           |
| Rosas, Sylvia E.     | Joslin Diabetes Center   | Principal Investigator          |
| Sophia A. Angus      | Joslin Diabetes Center   | Research Coordinator            |
| Sarah W Chen         | Joslin Diabetes Center   | Research Coordinator            |
| Asari Henshaw        | Joslin Diabetes Center   | Research Coordinator            |
| Neil Roy             | Joslin Diabetes Center   | Research Coordinator            |
| Imane H. Samari      | Joslin Diabetes Center   | Research Coordinator            |
| Gabriel Zeinoun      | Joslin Diabetes Center   | Research Coordinator            |
| Mallory Mandel       | Joslin Diabetes Center   | Study staff                     |
| Jenny Molina-Guzman  | Joslin Diabetes Center   | Study staff                     |
| Anna Kate Stawicki   | Joslin Diabetes Center   | Study staff                     |
| Melissa D. Rubinsky  | Joslin Diabetes Center   | Study staff,Other               |
| Julia A. Welch       | Joslin Diabetes Center   | Study staff,Other               |
| Lili Chan            | Mount Sinai              | Biopsy Operator                 |
| Daniel Stalbow       | Mount Sinai              | Biopsy Operator                 |
| Evren U Azeloglu     | Mount Sinai              | Co-Investigator                 |
| Jens Hansen          | Mount Sinai              | Co-Investigator                 |
| John Cijiang He      | Mount Sinai              | Co-Investigator                 |
| Carol R. Horowitz    | Mount Sinai              | Co-Investigator                 |
| Ravi Iyengar         | Mount Sinai              | Co-Investigator                 |
| Joji Tokita          | Mount Sinai              | Co-Investigator,Biopsy Operator |
| Patricia Kovatch     | Mount Sinai              | Co-Investigator,Other           |
| Marina de Cos        | Mount Sinai              | Fellow                          |
| Jonathan Haydak      | Mount Sinai              | Fellow,Patient Partner          |
| Lili Gai             | Mount Sinai              | Other                           |
| Patricia Kovatch     | Mount Sinai              | Other                           |
| Timothy D. Quinn     | Mount Sinai              | Other                           |
| Ronald E. Gordon     | Mount Sinai              | Pathologist                     |
| Ritu Gupta           | Mount Sinai              | Pathologist                     |
| Isaac E Stillman     | Mount Sinai              | Pathologist                     |
| Stephen C Ward       | Mount Sinai              | Pathologist                     |
| Kirk N Campbell      | Mount Sinai              | Principal Investigator          |
| Steven G. Coca       | Mount Sinai              | Principal Investigator          |
| Jonathan Himmelfarb  | Mount Sinai              | Principal Investigator          |
| Kristin Meliambro    | Mount Sinai              | Principal Investigator          |

|                      |                         |                                      |
|----------------------|-------------------------|--------------------------------------|
| Girish N Nadkarni    | Mount Sinai             | Principal Investigator               |
| Mark L Green         | Mount Sinai             | Project Manager                      |
| Brandon G Larson     | Mount Sinai             | Project Manager                      |
| Lorraine Evo-Ortega  | Mount Sinai             | Research Coordinator                 |
| Gina Koch            | Mount Sinai             | Research Coordinator                 |
| Marissa Patel        | Mount Sinai             | Research Coordinator                 |
| Sean Lefferts        | Mount Sinai             | Research Coordinator,Project Manager |
| Tejas Rao            | Mount Sinai             | Study staff                          |
| Samuel Mon-Wei Yu    | Mount Sinai             | Study staff                          |
| Pottumarthi V Prasad | Northwestern University | Co-Investigator                      |
| Samir V Parikh       | Ohio State University   | Co-Investigator                      |
| Brad H. Rovin        | Ohio State University   | Principal Investigator               |
| Gek Cher Chan        | Other                   | Co-Investigator                      |
| Yijiang Chen         | Other                   | Co-Investigator                      |
| Joana P. Gonçalves   | Other                   | Co-Investigator                      |
| Andrew Janowczyk     | Other                   | Co-Investigator                      |
| Blue B. Lake         | Other                   | Co-Investigator                      |
| Roy Lardenoije       | Other                   | Co-Investigator                      |
| Rosamond Rhodes      | Other                   | Co-Investigator                      |
| Milda R. Saunders    | Other                   | Co-Investigator                      |
| Jovan Tanevski       | Other                   | Co-Investigator                      |
| Seth Winfree         | Other                   | Co-Investigator                      |
| Robin Fallegger      | Other                   | Fellow                               |
| Steve Bogen          | Other                   | Other                                |
| Charlotte Boys       | Other                   | Other                                |
| Brandon Ginley       | Other                   | Other                                |
| Leah Guthrie         | Other                   | Other                                |
| Leonie Küchenhoff    | Other                   | Other                                |
| Brendon Lutnick      | Other                   | Other                                |
| Joseph Ardayfio      | Other                   | Patient Partner,Other                |
| Jack Bebiak          | Other                   | Patient Partner,Other                |
| Taneisha Campbell    | Other                   | Patient Partner,Other                |
| Robert Koewler       | Other                   | Patient Partner,Other                |
| Roy Pinkeney         | Other                   | Patient Partner,Other                |
| John Saul            | Other                   | Patient Partner,Other                |
| Dongwon Lee          | Other                   | Principal Investigator               |
| Anant Madabhushi     | Other                   | Principal Investigator               |
| Ari Pollack          | Other                   | Principal Investigator               |
| Julio Saez-Rodriguez | Other                   | Principal Investigator               |
| Raf Van de Plas      | Other                   | Principal Investigator               |
| Ashley R Burg        | Other                   | Research Coordinator,Study staff     |
| Lukasz G. Migas      | Other                   | Study staff                          |

|                        |                                        |                                  |
|------------------------|----------------------------------------|----------------------------------|
| Ljiljana Paša-Tolić    | Pacific Northwest National Laboratory  | Co-Investigator                  |
| Dusan Velickovic       | Pacific Northwest National Laboratory  | Co-Investigator                  |
| Jessica Lukowski       | Pacific Northwest National Laboratory  | Other                            |
| Christopher R Anderton | Pacific Northwest National Laboratory  | Principal Investigator           |
| Kisurb Choe            | Pacific Northwest National Laboratory  | Study staff                      |
| Brittney L. Gorman     | Pacific Northwest National Laboratory  | Study staff                      |
| George (Holt) Oliver   | Parkland Health and Hospital System    | Other                            |
| Rachel S. G. Sealfon   | Princeton University                   | Co-Investigator                  |
| Xi Chen                | Princeton University                   | Other                            |
| Weiguang Mao           | Princeton University                   | Other                            |
| Ksenia Sokolova        | Princeton University                   | Other                            |
| Aaron Wong             | Princeton University                   | Other                            |
| Olga G Troyanskaya     | Princeton University                   | Principal Investigator           |
| David H. Beyda, MD     | University of Arizona                  | Co-Investigator                  |
| thajudeen b            | University of Arizona                  | Co-Investigator                  |
| Rebecca Tsosie         | University of Arizona                  | Co-Investigator                  |
| Gregory Woodhead       | University of Arizona                  | Co-Investigator, Biopsy Operator |
| Erika R Bracamonte     | University of Arizona                  | Pathologist                      |
| Raymond Scott          | University of Arizona                  | Patient Partner                  |
| Frank C. Brosius       | University of Arizona                  | Principal Investigator           |
| Baltazar Campos        | University of Arizona                  | Research Coordinator             |
| Austin Derma           | University of Arizona                  | Research Coordinator             |
| Daniel Damian Duran    | University of Arizona                  | Research Coordinator             |
| Griselda Gamez         | University of Arizona                  | Research Coordinator             |
| Nicole Marquez         | University of Arizona                  | Research Coordinator             |
| Katherine Mendoza      | University of Arizona                  | Research Coordinator             |
| Ana Celina Sanora      | University of Arizona                  | Research Coordinator             |
| Kun Zhang              | University of California San Diego     | Co-Investigator                  |
| Tara K Sigdel          | University of California San Francisco | Co-Investigator                  |
| Kavya Anjani           | University of California San Francisco | Other                            |
| Tariq Mukatash         | University of California San Francisco | Other                            |
| Zoltan G. Laszik       | University of California San Francisco | Principal Investigator           |
| Minnie M Sarwal        | University of California San Francisco | Principal Investigator           |
| James G. Cimino        | University of California San Francisco | Research Coordinator             |
| Dane Munar             | University of California San Francisco | Research Coordinator             |
| Laura Pyle             | University of Colorado                 | Co-Investigator                  |
| Julia Wrobel           | University of Colorado                 | Co-Investigator                  |
| Carissa Vinovskis      | University of Colorado                 | Other                            |
| Petter Bjornstad       | University of Colorado                 | Principal Investigator           |
| Hsieh EWY              | University of Colorado                 | Principal Investigator           |
| Joshua M. Thurman      | University of Colorado                 | Principal Investigator           |
| Pinaki Sarder          | University of Florida                  | Co-Investigator                  |
| Manoj Kumar Galla      | University of Florida                  | Other                            |

|                         |                                 |                                              |
|-------------------------|---------------------------------|----------------------------------------------|
| Harshit Loha            | University of Florida           | Other                                        |
| Sayat Mimar             | University of Florida           | Other                                        |
| Samuel Border           | University of Florida           | Study staff                                  |
| Nicholas Lucarelli      | University of Florida           | Study staff                                  |
| Ahmed Naglah            | University of Florida           | Study staff                                  |
| Anindya S. Paul         | University of Florida           | Study staff                                  |
| Michael Tanious         | University of Illinois, Chicago | Biopsy Operator                              |
| Tanika N. Kelly         | University of Illinois, Chicago | Co-Investigator                              |
| Bui, JT or Bui, James T | University of Illinois, Chicago | Co-Investigator,Biopsy Operator              |
| Ron C. Gaba             | University of Illinois, Chicago | Co-Investigator,Biopsy Operator              |
| Aaron Scroggins         | University of Illinois, Chicago | Other                                        |
| Suman Setty             | University of Illinois, Chicago | Pathologist                                  |
| Monica L. Fox           | University of Illinois, Chicago | Patient Partner                              |
| James P. Lash           | University of Illinois, Chicago | Principal Investigator                       |
| Ana C. Ricardo          | University of Illinois, Chicago | Principal Investigator                       |
| Anand Srivastava        | University of Illinois, Chicago | Principal Investigator,Co-Investigator,Other |
| Joed Ancheta            | University of Illinois, Chicago | Research Coordinator                         |
| Eunice Carmona-Powell   | University of Illinois, Chicago | Research Coordinator                         |
| Natalie Meza            | University of Illinois, Chicago | Research Coordinator                         |
| Arabela Quiroga         | University of Illinois, Chicago | Research Coordinator                         |
| Amada Renteria          | University of Illinois, Chicago | Research Coordinator                         |
| Kim Silva               | University of Illinois, Chicago | Research Coordinator,Project Manager         |
| Devona Redmond          | University of Illinois, Chicago | Study staff,Other                            |
| Fadhl Alakwaa           | University of Michigan          | Co-Investigator                              |
| Ulysses G. J. Balis     | University of Michigan          | Co-Investigator                              |
| Markus Bitzer           | University of Michigan          | Co-Investigator                              |
| Yongqun He              | University of Michigan          | Co-Investigator                              |
| Wenjun Ju               | University of Michigan          | Co-Investigator                              |
| Laura H. Mariani        | University of Michigan          | Co-Investigator                              |
| Rajasree Menon          | University of Michigan          | Co-Investigator                              |
| Abhijit S. Naik         | University of Michigan          | Co-Investigator                              |
| Edgar A. Otto           | University of Michigan          | Co-Investigator                              |
| Jennifer A. Schaub      | University of Michigan          | Co-Investigator                              |
| Dawit Demeke            | University of Michigan          | Fellow                                       |
| Francesca Annese        | University of Michigan          | Other                                        |
| Heather K. Ascani       | University of Michigan          | Other                                        |
| Victoria M. Blanc       | University of Michigan          | Other                                        |
| Nathan Creger           | University of Michigan          | Other                                        |
| Rachel Dull             | University of Michigan          | Other                                        |
| Renee Frey              | University of Michigan          | Other                                        |
| Josh Hartley            | University of Michigan          | Other                                        |

|                       |                         |                                                        |
|-----------------------|-------------------------|--------------------------------------------------------|
| Chrysta C Lienczewski | University of Michigan  | Other                                                  |
| Becky Steck           | University of Michigan  | Other                                                  |
| Haneen Tout           | University of Michigan  | Other                                                  |
| Zach Wright           | University of Michigan  | Other                                                  |
| Matthias Kretzler     | University of Michigan  | Principal Investigator                                 |
| Jeffrey B. Hodgins    | University of Michigan  | Principal Investigator,Co-<br>Investigator,Pathologist |
| Lalita Subramanian    | University of Michigan  | Project Manager                                        |
| Nikole Bonevich       | University of Michigan  | Project Manager,Other                                  |
| Ninive Conser         | University of Michigan  | Study staff                                            |
| Sean Eddy             | University of Michigan  | Study staff                                            |
| John Hartman          | University of Michigan  | Study staff                                            |
| Phillip J. McCown     | University of Michigan  | Study staff                                            |
| Viji Nair             | University of Michigan  | Study staff                                            |
| Rebecca Reamy         | University of Michigan  | Study staff                                            |
| Michael P. Rose       | University of Michigan  | Study staff                                            |
| Cathy Smith           | University of Michigan  | Study staff                                            |
| Donna D'Souza         | University of Minnesota | Biopsy Operator                                        |
| Siobhan M. Flanagan   | University of Minnesota | Biopsy Operator                                        |
| Jerica M. Berge       | University of Minnesota | Co-Investigator                                        |
| Drawz PE              | University of Minnesota | Co-Investigator                                        |
| Tasma Harindhanavudhi | University of Minnesota | Co-Investigator                                        |
| Sisi Ma               | University of Minnesota | Co-Investigator                                        |
| Elizabeth A. Rogers   | University of Minnesota | Co-Investigator                                        |
| Michael S. Rosenberg  | University of Minnesota | Co-Investigator                                        |
| Sami Safadi           | University of Minnesota | Co-Investigator                                        |
| Susan M. Wolf         | University of Minnesota | Co-Investigator                                        |
| Christopher J. Jones  | University of Minnesota | Co-Investigator,Biopsy Operator                        |
| Sandeep Sharma        | University of Minnesota | Co-Investigator,Biopsy Operator                        |
| Oyedele A. Adeyi      | University of Minnesota | Pathologist                                            |
| Yanli Ding            | University of Minnesota | Pathologist                                            |
| Ann Gentry            | University of Minnesota | Patient Partner                                        |
| Susan Klett           | University of Minnesota | Patient Partner                                        |
| M. Luiza Caramori     | University of Minnesota | Principal Investigator                                 |
| Patrick H. Nachman    | University of Minnesota | Principal Investigator                                 |
| Alyson Coleman        | University of Minnesota | Project Manager                                        |
| Dori Henderson        | University of Minnesota | Project Manager                                        |
| Cathy A Bagne         | University of Minnesota | Research Coordinator                                   |
| Rachel R. Kaspari     | University of Minnesota | Research Coordinator                                   |
| Oluwatosin Oluwole    | University of Minnesota | Research Coordinator                                   |
| Via Rao               | University of Minnesota | Research Coordinator                                   |
| Nicolas J Rauwolf     | University of Minnesota | Research Coordinator                                   |
| Michelle L. Snyder    | University of Minnesota | Research Coordinator                                   |

|                        |                                                          |                                  |
|------------------------|----------------------------------------------------------|----------------------------------|
| Zoe Wright             | University of Minnesota                                  | Research Coordinator             |
| Alison Bunio Alvear    | University of Minnesota                                  | Study staff                      |
| Peter R. Bream, Jr.    | University of North Carolina                             | Biopsy Operator                  |
| Nicole Keefe           | University of North Carolina                             | Biopsy Operator                  |
| Priya Mody             | University of North Carolina                             | Biopsy Operator                  |
| Saad Mohammed Shariff  | University of North Carolina                             | Biopsy Operator                  |
| Alexander Villalobos   | University of North Carolina                             | Biopsy Operator                  |
| Prabir Roy-Chaudhury   | University of North Carolina                             | Co-Investigator                  |
| Evan M. Zeitler        | University of North Carolina                             | Co-Investigator                  |
| Vanessa Moreno         | University of North Carolina                             | Co-Investigator,Pathologist      |
| Samuel Haddad          | University of North Carolina                             | Other                            |
| J Charles Jennette     | University of North Carolina                             | Pathologist                      |
| Jennifer L. Jones      | University of North Carolina                             | Patient Partner                  |
| Amy K. Mottl           | University of North Carolina                             | Principal Investigator           |
| Tashas Cameron-Wheeler | University of North Carolina                             | Research Coordinator             |
| Mary M. Collie         | University of North Carolina                             | Research Coordinator             |
| Anne Froment           | University of North Carolina                             | Research Coordinator             |
| Dhatri Kakarla         | University of North Carolina                             | Research Coordinator             |
| Sara S. Kelley         | University of North Carolina                             | Research Coordinator             |
| Sora Lee               | University of North Carolina                             | Research Coordinator             |
| Fernanda Ochoa Toro    | University of North Carolina                             | Research Coordinator             |
| Sandhya Sundar Rajan   | University of North Carolina                             | Research Coordinator,Study staff |
| Matthew Gilliam        | University of Pittsburgh                                 | Other                            |
| Daniel E. Hall         | University of Pittsburgh                                 | Other                            |
| John A. Kellum         | University of Pittsburgh                                 | Other                            |
| Roderick Tan           | University of Pittsburgh                                 | Other                            |
| James Winters          | University of Pittsburgh                                 | Other                            |
| Parmjeet Randhawa      | University of Pittsburgh                                 | Pathologist                      |
| Raghavan Murugan       | University of Pittsburgh                                 | Principal Investigator           |
| Paul M. Palevsky       | University of Pittsburgh                                 | Principal Investigator           |
| Matthew R. Rosengart   | University of Pittsburgh                                 | Principal Investigator           |
| Michele M Elder        | University of Pittsburgh                                 | Project Manager                  |
| Adam Burgess           | University of Pittsburgh                                 | Research Coordinator             |
| Tina Vita              | University of Pittsburgh                                 | Research Coordinator             |
| Soumya Maity           | University of Texas Health Science Center at San Antonio | Co-Investigator                  |
| Guanshi Zhang          | University of Texas Health Science Center at San Antonio | Co-Investigator                  |
| manjeri venkatachalam  | University of Texas Health Science Center at San Antonio | Co-Investigator,Pathologist      |
| Bhupendra Kumar Gurung | University of Texas Health Science Center at San Antonio | Other                            |

|                       |                                                          |                                 |
|-----------------------|----------------------------------------------------------|---------------------------------|
| Annapurna Pamreddy    | University of Texas Health Science Center at San Antonio | Other                           |
| Hongping Ye           | University of Texas Health Science Center at San Antonio | Other                           |
| Shiqi Zhang           | University of Texas Health Science Center at San Antonio | Other                           |
| Kumar Sharma          | University of Texas Health Science Center at San Antonio | Principal Investigator          |
| NAGARJUNACHARY RAGI   | University of Texas Health Science Center at San Antonio | Study staff                     |
| Samuel Rice           | University of Texas Southwestern                         | Biopsy Operator                 |
| S. Susan Hedayati     | University of Texas Southwestern                         | Co-Investigator                 |
| Meredith C McAdams    | University of Texas Southwestern                         | Co-Investigator                 |
| R. Tyler Miller       | University of Texas Southwestern                         | Co-Investigator                 |
| Jiten Patel           | University of Texas Southwestern                         | Co-Investigator                 |
| Choudhary Moaz        | University of Texas Southwestern                         | Co-Investigator,Biopsy Operator |
| Sanjeeva P. Kalva     | University of Texas Southwestern                         | Co-Investigator,Biopsy Operator |
| Allen R Hendricks     | University of Texas Southwestern                         | Co-Investigator,Pathologist     |
| Asra Kermani MD       | University of Texas Southwestern                         | Other                           |
| Simon C. Lee          | University of Texas Southwestern                         | Other                           |
| Harold Park           | University of Texas Southwestern                         | Other                           |
| Anil Pillai           | University of Texas Southwestern                         | Other                           |
| Natasha Wen           | University of Texas Southwestern                         | Other                           |
| Qi Cai                | University of Texas Southwestern                         | Pathologist                     |
| Jose R. Torrealba     | University of Texas Southwestern                         | Pathologist                     |
| Catherine Campbell    | University of Texas Southwestern                         | Patient Partner                 |
| Robert D Toto         | University of Texas Southwestern                         | Principal Investigator          |
| Miguel A. Vazquez     | University of Texas Southwestern                         | Principal Investigator          |
| Shihong Ma            | University of Texas Southwestern                         | Research Coordinator            |
| Nancy Wang            | University of Texas Southwestern                         | Research Coordinator            |
| Boris S. Patlis       | University of Texas Southwestern                         | Research Coordinator,Other      |
| Andrew N Hoofnagle    | University of Washington                                 | Co-Investigator                 |
| Robyn L. McClelland   | University of Washington                                 | Co-Investigator                 |
| Kasra A Rezaei        | University of Washington                                 | Co-Investigator                 |
| Jaime Snyder          | University of Washington                                 | Co-Investigator                 |
| Katherine R. Tuttle   | University of Washington                                 | Co-Investigator                 |
| Bessie A. Young       | University of Washington                                 | Co-Investigator                 |
| Christine P Limonte   | University of Washington                                 | Co-Investigator,Fellow          |
| Ruikang Wang          | University of Washington                                 | Co-Investigator,Other           |
| Stephanie M. Grewenow | University of Washington                                 | Other                           |
| Cienn N. Joyeux       | University of Washington                                 | Other                           |
| Yunbi Nam             | University of Washington                                 | Other                           |
| Christopher Park      | University of Washington                                 | Other                           |

|                        |                                 |                                            |
|------------------------|---------------------------------|--------------------------------------------|
| Adam Wilcox            | University of Washington        | Other                                      |
| Kayleen Williams       | University of Washington        | Other                                      |
| CE Alpers              | University of Washington        | Pathologist                                |
| Kelly D. Smith         | University of Washington        | Pathologist                                |
| Keith D. Brown         | University of Washington        | Patient Partner                            |
| Lynda Hayashi          | University of Washington        | Patient Partner                            |
| Nichole M. Jefferson   | University of Washington        | Patient Partner                            |
| Richard A. Knight      | University of Washington        | Patient Partner                            |
| Glenda V. Roberts      | University of Washington        | Patient Partner                            |
| Christy Stutzke        | University of Washington        | Patient Partner                            |
| Ian H. de Boer         | University of Washington        | Principal Investigator,Co-<br>Investigator |
| Brooke Berry           | University of Washington        | Project Manager                            |
| Kristina N Blank       | University of Washington        | Project Manager                            |
| Ashveena L Dighe       | University of Washington        | Project Manager                            |
| Alexa Plisiewicz       | University of Washington        | Project Manager                            |
| Natalya Sarkisova      | University of Washington        | Project Manager                            |
| Ashley C Berglund      | University of Washington        | Study staff                                |
| Jonas M Carson         | University of Washington        | Study staff                                |
| Matthew Dekker         | University of Washington        | Study staff                                |
| Frederick Dowd         | University of Washington        | Study staff                                |
| Jimmy Phuong           | University of Washington        | Study staff                                |
| Artit Wangperawong     | University of Washington        | Study staff                                |
| de Caestecker M.P.     | Vanderbilt University           | Co-Investigator                            |
| Agnes B. Fogo          | Vanderbilt University           | Co-Investigator,Pathologist                |
| Katerina V. Djambazova | Vanderbilt University           | Fellow                                     |
| Audra M. Judd          | Vanderbilt University           | Other                                      |
| Yarieli Cuevas-Rios    | Vanderbilt University           | Patient Partner                            |
| Yuankai Huo            | Vanderbilt University           | Principal Investigator                     |
| Jeffrey M. Spraggins   | Vanderbilt University           | Principal Investigator                     |
| Melissa A Farrow       | Vanderbilt University           | Project Manager                            |
| Jamie L Allen          | Vanderbilt University           | Study staff                                |
| Madeline E. Colley     | Vanderbilt University           | Study staff                                |
| Ruining Deng           | Vanderbilt University           | Study staff                                |
| Martin Dufresne        | Vanderbilt University           | Study staff                                |
| Angela R.S. Kruse      | Vanderbilt University           | Study staff                                |
| Jeannine Basta         | Washington University St. Louis | Co-Investigator                            |
| Anitha Vijayan         | Washington University St. Louis | Co-Investigator                            |
| Reetika Ghag           | Washington University St. Louis | Other                                      |
| Amanda Knoten          | Washington University St. Louis | Other                                      |
| Asmita L               | Washington University St. Louis | Other                                      |
| Stephanie Reinert      | Washington University St. Louis | Other                                      |
| Joseph P. Gaut         | Washington University St. Louis | Pathologist                                |

|                           |                                 |                                        |
|---------------------------|---------------------------------|----------------------------------------|
| Michael Rauchman          | Washington University St. Louis | Principal Investigator                 |
| Sanjay Jain               | Washington University St. Louis | Principal Investigator,Other           |
| Madhurima Kaushal         | Washington University St. Louis | Project Manager,Study staff            |
| Amy McMurray              | Washington University St. Louis | Research Coordinator                   |
| Kristine Conlon           | Washington University St. Louis | Research Coordinator,Patient Partner   |
| Brittany C Minor          | Washington University St. Louis | Study staff                            |
| Gerald Nwanne             | Washington University St. Louis | Study staff                            |
| Bo Zhang                  | Washington University St. Louis | Study staff                            |
| Jeffrey M Turner          | Yale University                 | Biopsy Operator                        |
| Moledina DG               | Yale University                 | Co-Investigator                        |
| Tanima Arora              | Yale University                 | Other                                  |
| Gilbert W. Moeckel        | Yale University                 | Pathologist                            |
| Vijayakumar R Kakade      | Yale University                 | Principal Investigator                 |
| Lloyd G Cantley           | Yale University                 | Principal Investigator,Co-Investigator |
| F. Perry Wilson           | Yale University                 | Principal Investigator,Co-Investigator |
| Ugochukwu Ugwuowo         | Yale University                 | Research Coordinator                   |
| Angela M. Victoria-Castro | Yale University                 | Research Coordinator                   |
| Melissa M. Shaw           | Yale University                 | Research Coordinator,Study staff       |
| Tiffany Budiman           | Yale University                 | Study staff                            |

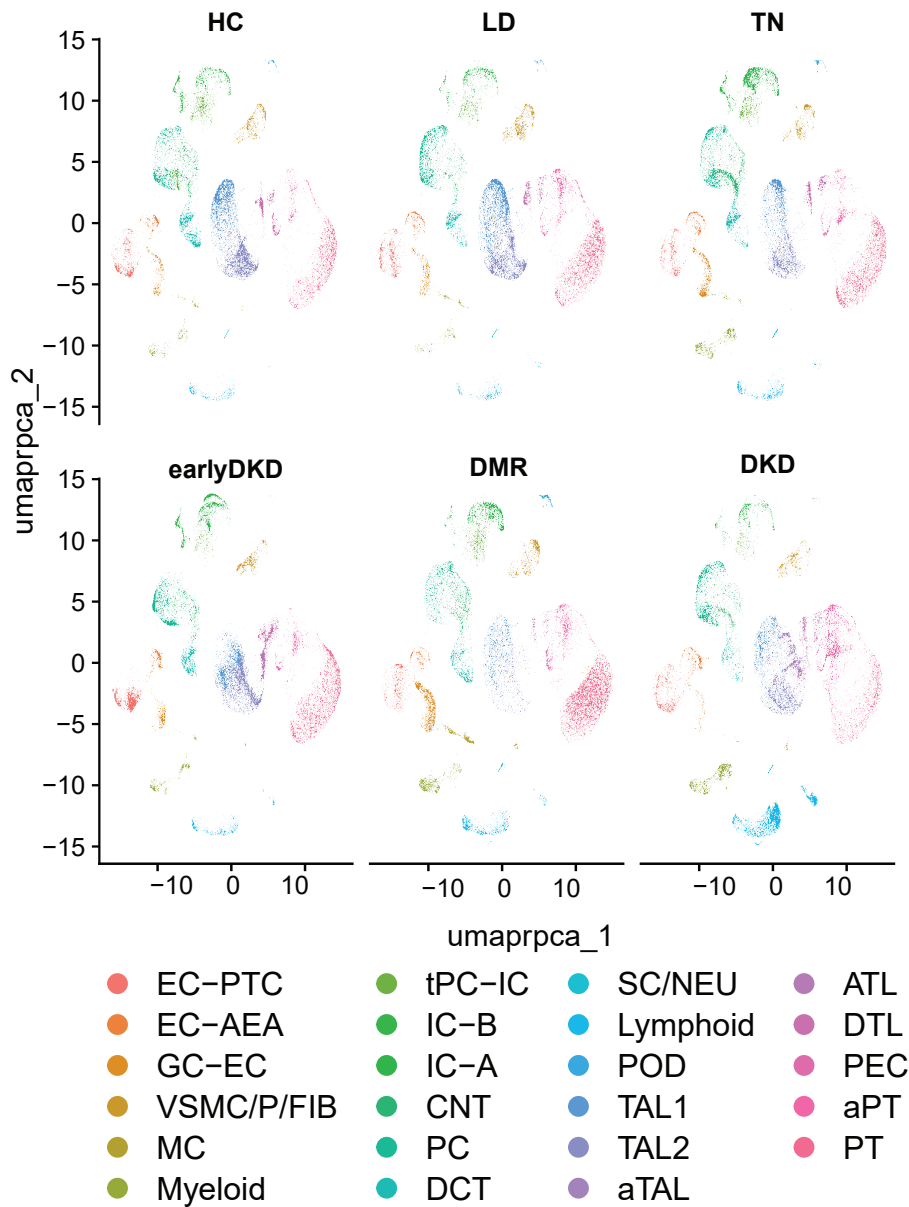

### Supplementary Figure S1. Split UMAP of the 6 sample groups studied

Abbreviations: HC- healthy controls; LD- living kidney donor; TN- tumor nephrectomy;

DMR - diabetes mellitus resistor; DKD - diabetic kidney disease;

Cell types: podocyte, POD; parietal epithelial cell, PEC; proximal tubule, PT; adaptive/maladaptive, aPT; descending thin loop of Henle, DTL; ascending thin loop of Henle, ATL; thick ascending loop of Henle, TAL; adaptive/maladaptive thick ascending loop of Henle, aTAL; distal convoluted tubule, DCT; connecting tubule, CNT; principal cell, PC; intercalated type A, IC-A; Intercalated type B, IC-B; transient between PC and IC, tPC-IC; endothelial cell EC; efferent and afferent arteriolar endothelial cells EC-AEA; glomerular endothelial cell, EC-GC; fibroblast, FIB; vascular smooth muscle cell, VSMC; pericyte, P; mesangial cell, MC; myeloid cell, MYL; B cell, B; T cell, T; natural killer T cell, NK T/C.

Supplementary Figure S2

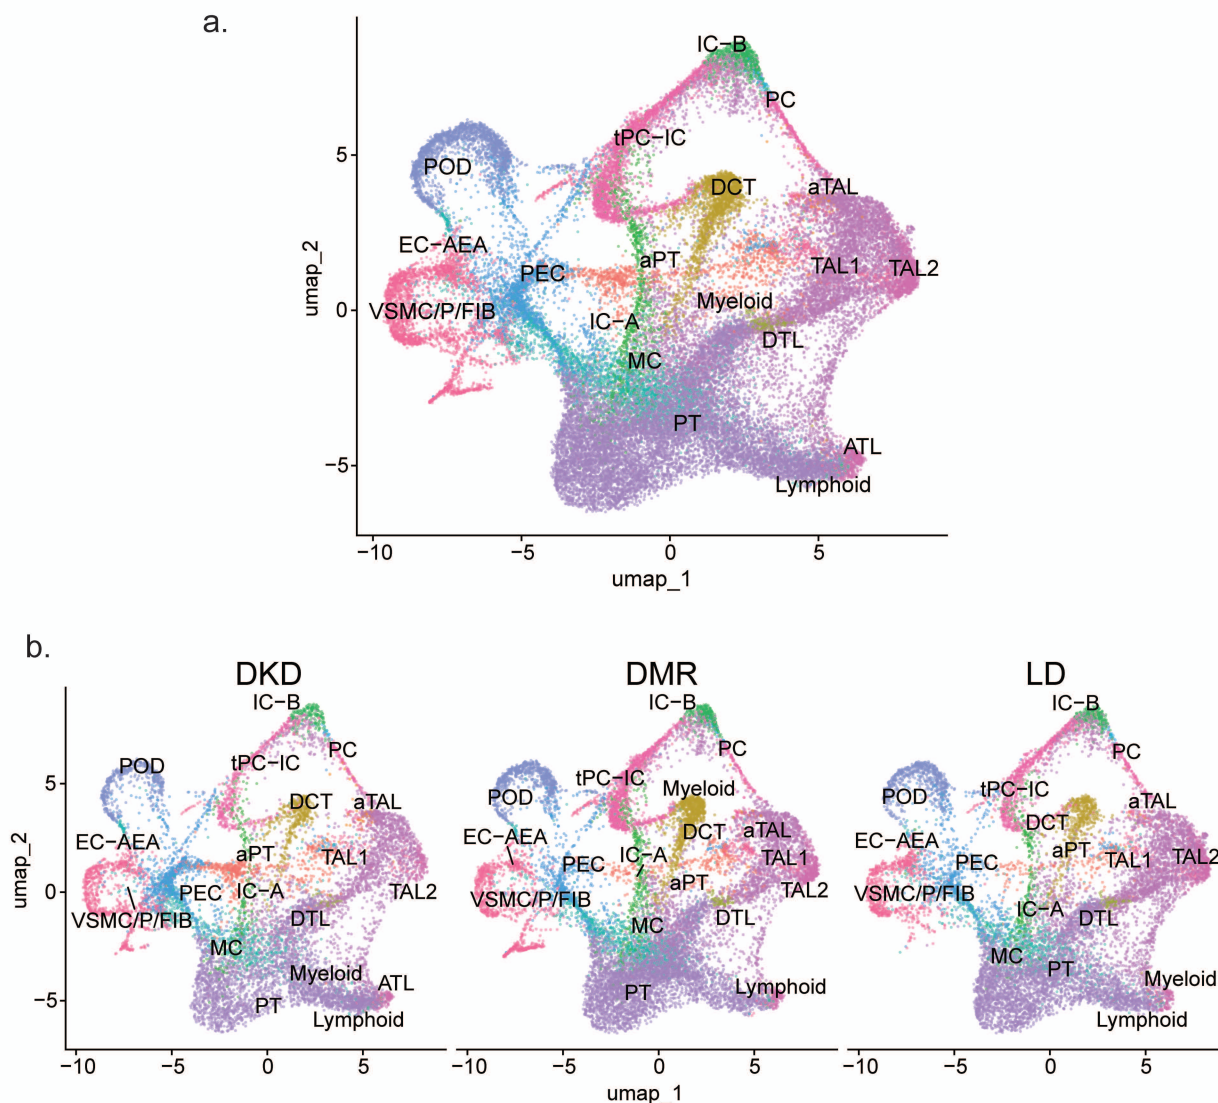

**Supplementary Figure S2. UMAPs of Visium data.** a. Combined and b. split UMAPs of the integrated Visium dataset containing LD, DMR-R and DKD samples. These datasets were downloaded from KPMP repository site., 15 samples per LD, and DM-R, and 13 samples in DKD. 38,942 spots in total from the three sample groups.

Abbreviations: Living donor LD, Diabetes mellitus resilient DM-R, Diabetic kidney disease DKD  
 Cell types: podocyte, POD; parietal epithelial cell, PEC; proximal tubule, PT; adaptive/maladaptive, aPT; descending thin loop of Henle, DTL; ascending thin loop of Henle, ATL; thick ascending loop of Henle, TAL; adaptive/maladaptive thick ascending loop of Henle, aTAL; distal convoluted tubule, DCT; connecting tubule, CNT; principal cell, PC; intercalated type A, IC-A; Intercalated type B, IC-B; transient between PC and IC, tPC-IC; endothelial cell EC; efferent and afferent arteriolar endothelial cells EC-AEA; glomerular endothelial cell, EC-GC; fibroblast, FIB; vascular smooth muscle cell, VSMC; pericyte, P; mesangial cell, MC; myeloid cell, MYL; B cell, B; T cell, T; natural killer T cell, NK T/C.

Supplementary Figure S3

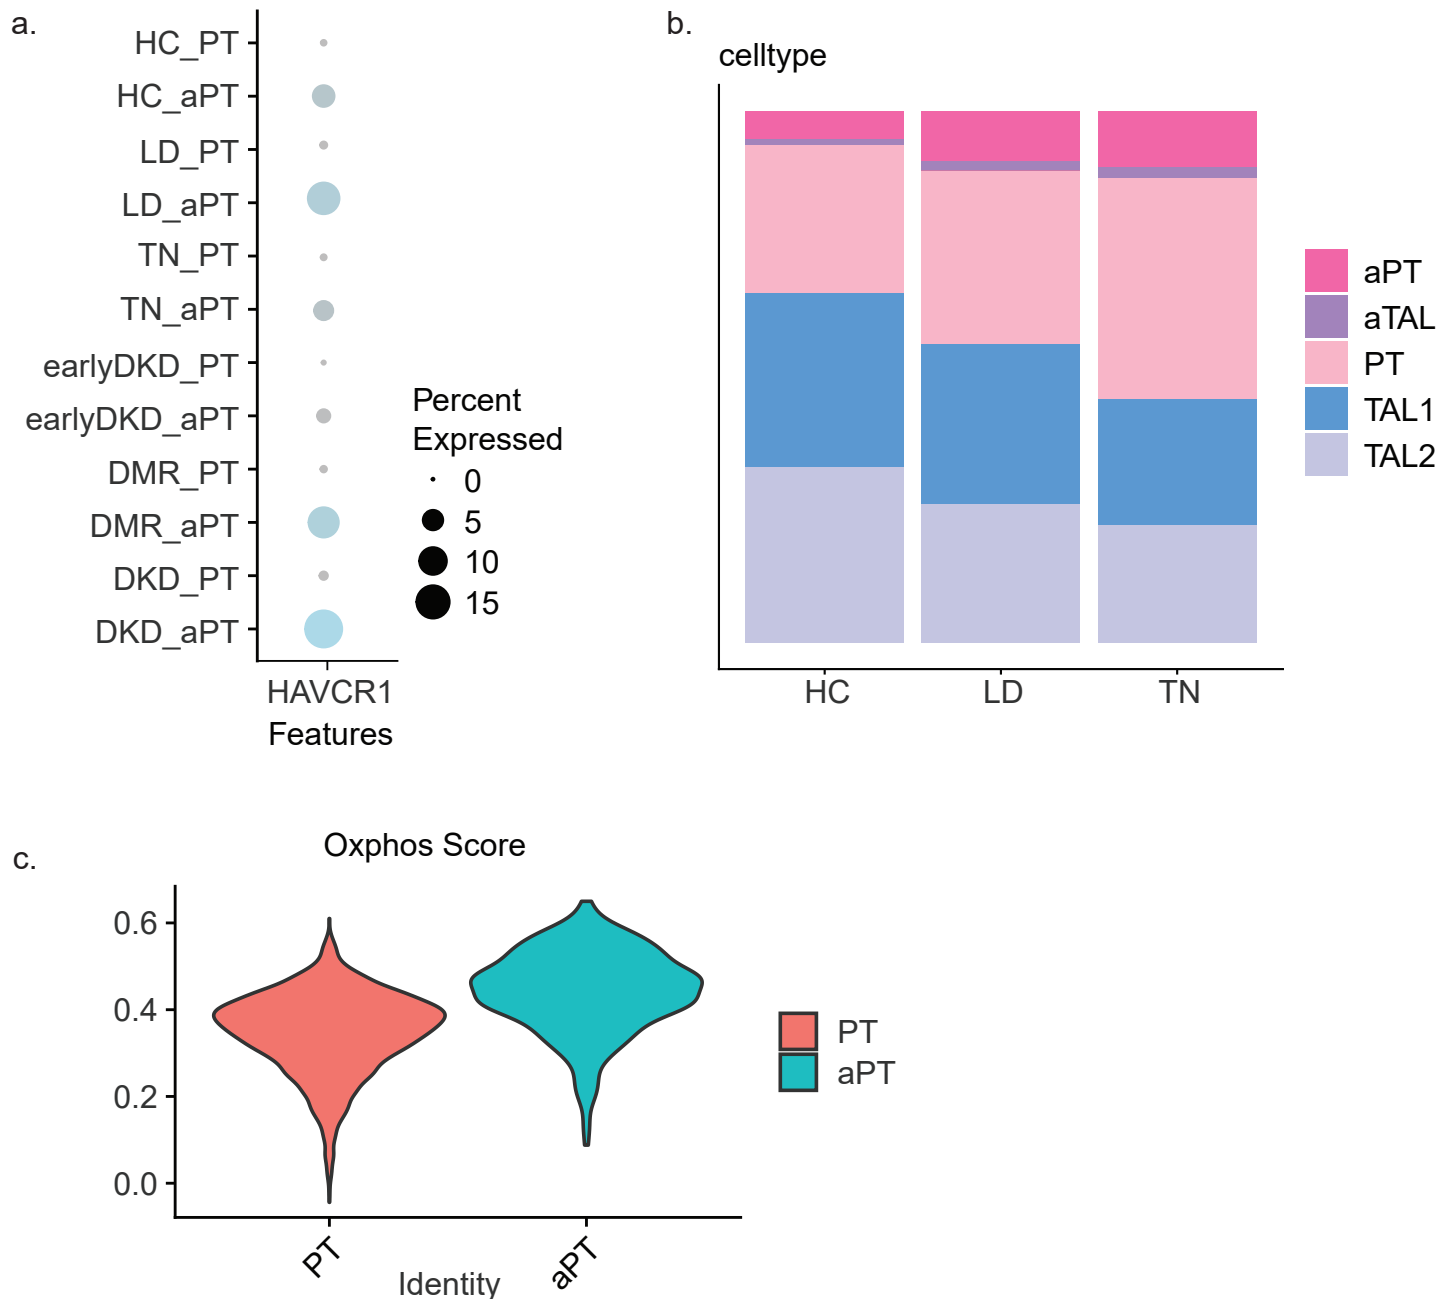

**Supplementary Figure S3. Cell states.** **a.** Expression levels of HAVCR1 (Hepatitis A Virus Cellular Receptor 1), also known as TIM-1 (T-cell immunoglobulin mucin domain-1) or KIM-1 (Kidney Injury Molecule-1) in proximal cell states. **b.** Proportion of cell states in proximal epithelial and thick ascending loop cells in reference groups. **c.** Oxidative phosphorylation in the PT cell states (PT and aPT) in DM-R.

Abbreviations: HC- healthy controls; LD- living kidney donor; TN- tumor nephrectomy; PT-proximal tubule, adaptive/maladaptive proximal tubule - aPT; TAL-thick ascending loop of Henle; adaptive/maladaptive thick ascending loop of Henle-aTAL.

Supplementary Figure S4

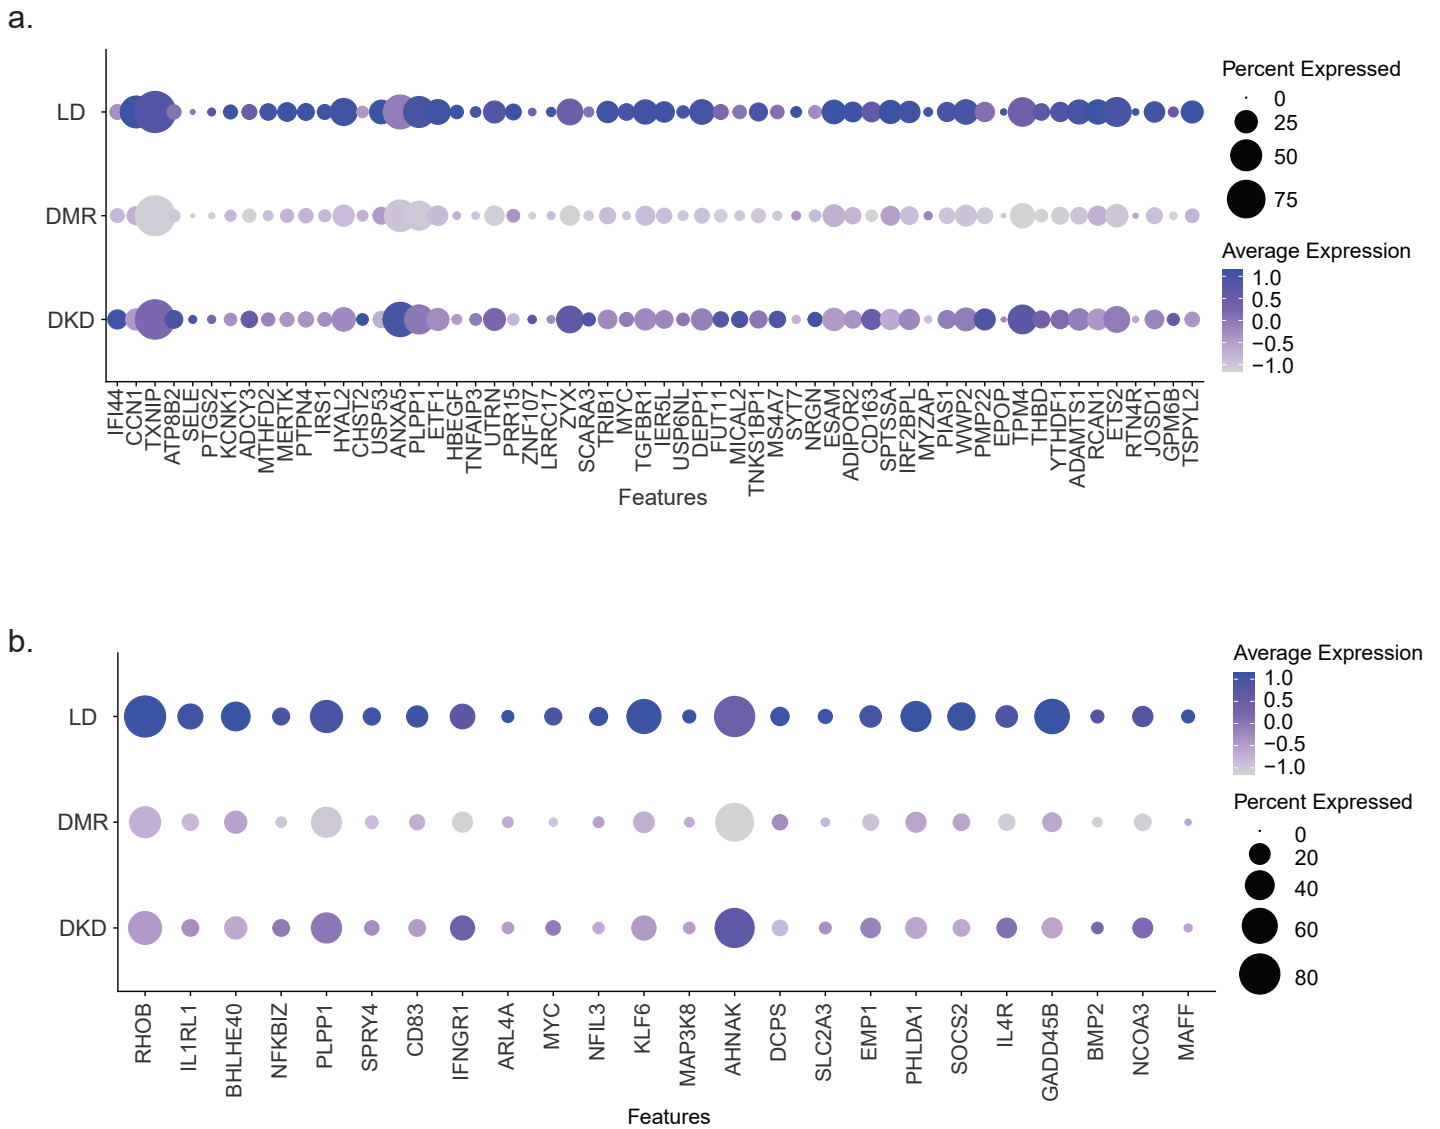

**Supplementary Figure S4. TNFA signaling and IL2-STAT5 pathway genes** **a.** Dot plot showing the expression pattern of genes involved in TNFA signaling (Hallmark pathway TNFA\_SIGNALING\_VIA\_NFKB) in LD, DM-R and DKD. Only the genes that were significantly ( $p_{adj} < 0.05$ ) differentially expressed in DKD versus LD are shown. **b.** Dot Plot showing the expression pattern of genes involved in IL2/STAT5 signaling (Hallmark pathway: IL2\_STAT5\_SIGNALING) in LD, DM-R and DKD. Only the genes that were significantly ( $p_{adj} < 0.05$ ) differentially expressed in DM-R versus LD are shown.

Abbreviations: LD - living kidney donor; DMR - diabetes mellitus resistor; DKD - diabetic kidney disease;

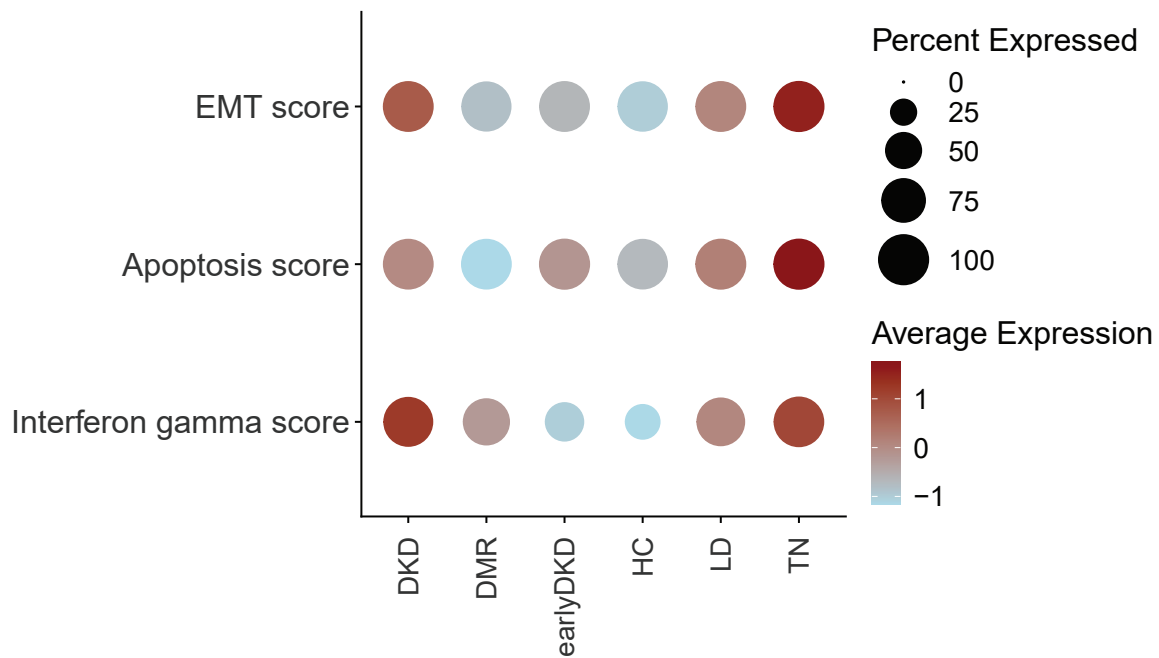

**Supplementary Figure S5. Pathway scores.** Dot plot showing the scores generated for the genes involved in epithelial-to-mesenchymal transition (EMT), apoptosis and interferon gamma response in the visium data of all 6 sample groups. 15 samples each in LD and DM-R, 13 samples in DKD, 5 samples in HC, 4 samples in early DKD and 2 samples in TN  
Abbreviations: Healthy control HC, Living donor LD, Tumor-nephrectomy TN, Diabetes mellitus resilient DM-R, early diabetic kidney disease earlyDKD, Diabetic kidney disease DKD
